# Supplementary material for: Temporal and spatial shifts in the foliar fungal endophyte community of Norway spruce (Picea abies) over 150 years in Finland
Source: Research Square preprint supplement (doi:10.21203/rs.3.rs-7740907/v1), 2025-11-05
Supplement: Supplementary file 1 [file f1dddf0def264b967df84653.docx]

**
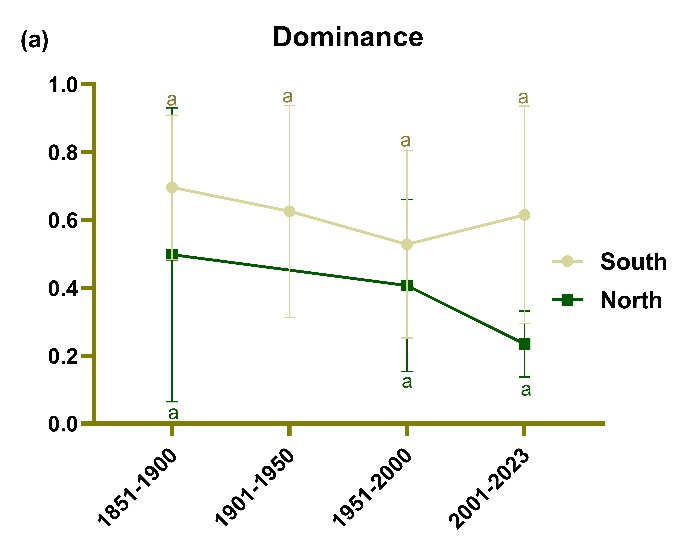

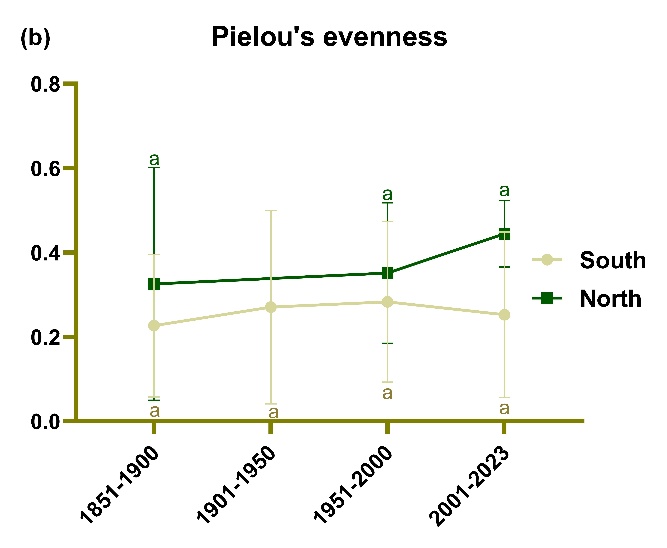

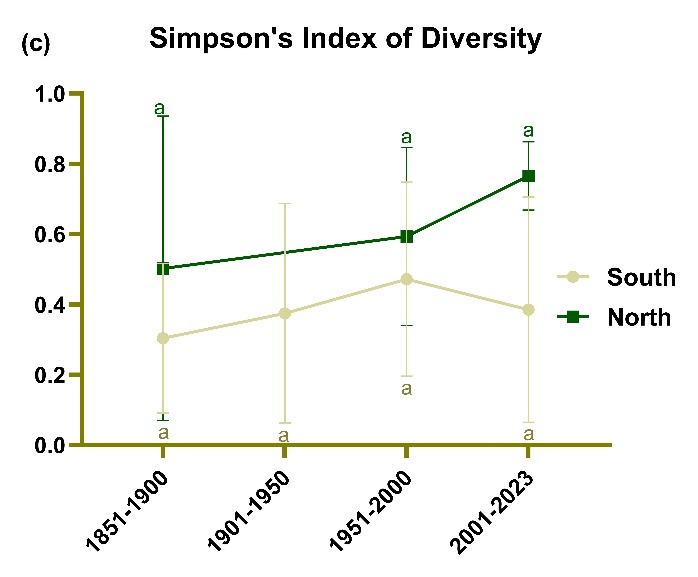
**

**Figure S1** The alpha diversity indices of fungal community from south and north in 50-year groups. Letters above the column represent the significant difference (*P* < 0.05) among groups.
